# Supplementary material for: Comparison of allograft-prosthetic composite reconstruction and modular prosthetic replacement in proximal femur bone tumors: Functional assessment by gait analysis in 20 patients
Source: PubMed Central journal article supplement — Acta Orthop. 2013 Apr 18;84(2):218–23. doi: 10.3109/17453674.2013.773119 (PMC3639346; doi:10.3109/17453674.2013.773119), 2013-04-18
Supplement: ORT-84-218-s5474.pdf [file ORT-84-218-s5474.pdf]

Supplementary article data

# Comparison of allograft-prosthetic composite reconstruction and modular prosthetic replacement in proximal femur bone tumors

## Functional assessment by gait analysis in 20 patients

Maria Grazia Benedetti<sup>1</sup>, Enrica Bonatti<sup>2</sup>, Calogero Malfitano<sup>2</sup>, and Davide Donati<sup>3</sup>

<sup>1</sup>Physical Medicine and Rehabilitation Unit; <sup>2</sup>Movement Analysis Laboratory; <sup>3</sup>Bone Tumor Center, Istituto Ortopedico Rizzoli, Bologna, Italy.  
Correspondence: benedetti@ior.it  
Submitted 12-02-28. Accepted 12-12-11

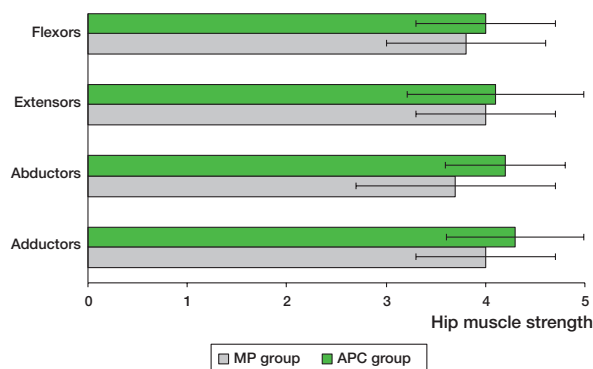

Figure 1. Hip muscle strength (mean and SD) as assessed by the manual muscle test.

Table 2. Gait analysis data

|                                     | One-way ANOVA<br>or<br>Kruskal-Wallis <sup>a</sup><br>p-value | Control     | MP group    | APC group  | Sheffe test (Mann-Whitney <sup>a</sup> ) |                                  |                                   |
|-------------------------------------|---------------------------------------------------------------|-------------|-------------|------------|------------------------------------------|----------------------------------|-----------------------------------|
|                                     |                                                               |             |             |            | Control/MP<br>group<br>p-value           | Control/<br>APC group<br>p-value | MP group/<br>APC group<br>p-value |
| <i>Time-distance parameters</i>     |                                                               |             |             |            |                                          |                                  |                                   |
| Stance, % cycle                     | 0.07 <sup>a</sup>                                             | 60.2 (1.9)  | 60.3 (1.7)  | 59.1 (2.3) |                                          |                                  |                                   |
| Cadence, str/m                      | < 0.001                                                       | 54.4 (3.6)  | 45.9 (4.5)  | 52 (5.2)   | < 0.001                                  | 0.028                            | < 0.001                           |
| Speed of progression, cm/s          | < 0.001                                                       | 133.5 (16)  | 99.8 (14.5) | 111 (18.7) | < 0.001                                  | < 0.001                          | 0.006                             |
| Stride length, %h                   | < 0.001                                                       | 83.3 (7.5)  | 73.4 (6.2)  | 74.6 (6.7) | < 0.001                                  | < 0.001                          | 0.8                               |
| <i>Pelvis rotations (degrees)</i>   |                                                               |             |             |            |                                          |                                  |                                   |
| Max. anterior tilt                  | 0.006 <sup>a</sup>                                            | -4.3 (2.9)  | -2.5 (4.5)  | -2 (2.6)   | 0.03 <sup>a</sup>                        | 0.004 <sup>a</sup>               | 0.32 <sup>a</sup>                 |
| Max. rise (operated side)           | 0.2                                                           | -3.3 (2)    | -3.8 (3)    | -3.3 (2.6) |                                          |                                  |                                   |
| Max. drop (operated side)           | 0.1 <sup>a</sup>                                              | 2 (1.5)     | 2.6 (2.6)   | 3.3 (3.7)  |                                          |                                  |                                   |
| Max. anterior rotation              | 0.57                                                          | 4.3 (3.3)   | 4.6 (4)     | 4.9 (4.5)  |                                          |                                  |                                   |
| <i>Hip kinematics (degrees)</i>     |                                                               |             |             |            |                                          |                                  |                                   |
| Flexion at heel strike              | < 0.001                                                       | 27 (4.3)    | 19.4 (5.4)  | 19 (3.3)   | < 0.001                                  | < 0.001                          | 0.8                               |
| Max. extension stance               | 0.004                                                         | -10.7 (3.6) | -10.7 (5.1) | -8.2 (3.4) | 0.8                                      | 0.013                            | 0.02                              |
| Flexion at toe-off                  | < 0.001                                                       | -4 (3.3)    | -6.4 (3.6)  | -1.7 (3.9) | 0.005                                    | 0.009                            | < 0.001                           |
| Max. flexion swing                  | < 0.001                                                       | 30 (4.5)    | 23.1 (6.1)  | 25.2 (4.9) | < 0.001                                  | < 0.001                          | 0.19                              |
| Active ROM sagittal plane           | < 0.001                                                       | 40.3 (4.1)  | 33.2 (6.7)  | 31.4 (4.2) | < 0.001                                  | < 0.001                          | 0.4                               |
| Active ROM coronal plane            | 0.04                                                          | 11.3 (2.6)  | 10.2 (3.5)  | 9.7 (3.3)  | 0.09                                     | 0.06                             | 0.14                              |
| Max. adduction stance               | 0.001                                                         | -6 (3.7)    | -2.9 (3.4)  | -4.7 (4.8) | 0.001                                    | 0.11                             | 0.09                              |
| Max. abduction swing                | 0.04                                                          | 5 (3.5)     | 7 (3.2)     | 5.6 (4.8)  | 0.05                                     | 0.15                             | 0.13                              |
| Active ROM transverse plane         | 0.02                                                          | 13 (3.3)    | 11.8 (4.2)  | 14.3 (4)   | 0.2                                      | 0.08                             | 0.06                              |
| Max. internal rotation              | 0.001 <sup>a</sup>                                            | 2.6 (4)     | 5.2 (3.5)   | 6.5 (6.4)  | 0.03 <sup>a</sup>                        | < 0.001 <sup>a</sup>             | 0.3                               |
| Max. external rotation              | 0.3 <sup>a</sup>                                              | -9 (4.5)    | -6.3 (6)    | -9 (7)     |                                          |                                  |                                   |
| <i>Hip external moments (%BWxH)</i> |                                                               |             |             |            |                                          |                                  |                                   |
| Max. flexion moment                 | < 0.001                                                       | 9 (1.8)     | 4.3 (2.4)   | 3.7 (1.9)  | < 0.001                                  | < 0.001                          | 0.31                              |
| Max. extension moment               | 0.003 <sup>a</sup>                                            | -3 (1.8)    | -2 (0.9)    | -2.9 (1.5) | 0.001 <sup>a</sup>                       | 0.19 <sup>a</sup>                | 0.012 <sup>a</sup>                |
| Max. adduction moment               | < 0.001                                                       | -10.3 (1.6) | -3.6 (2.1)  | -4 (1.7)   | < 0.001                                  | < 0.001                          | 0.75                              |
| Max. ext. rot. moment               | < 0.001 <sup>a</sup>                                          | -1.9 (0.9)  | 0.1 (0.4)   | 0.3 (0.8)  | < 0.001 <sup>a</sup>                     | 0.001 <sup>a</sup>               | 0.18 <sup>a</sup>                 |
